# Supplementary material
Source: Springer Nature journal article supplement (https://www.springermedizin.de/resource/supplementary/13051_2010_178_MOESM1_ESM.pdf/9670160)

## Stage UICC

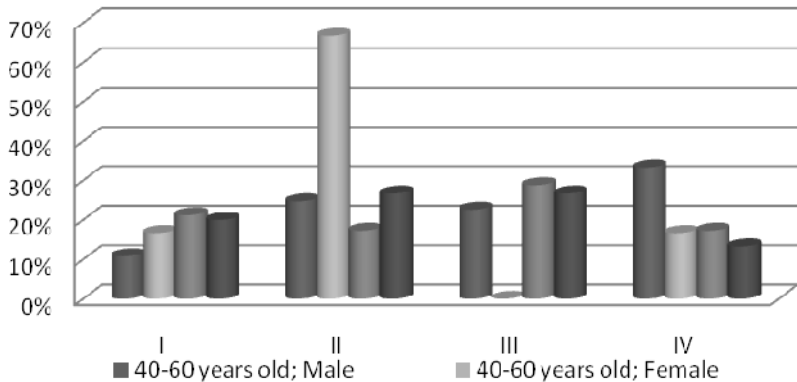

Supplement: MOESM1 [file 9670160]
